# Supplementary material
Source: PubMed Central journal article supplement (PMC3137281)

## Supplementary Information

Dalei Wu<sup>a</sup>, Wen Li<sup>a</sup>, Patty Lok<sup>a</sup>, Fumio Matsumura<sup>a,b</sup>, Christoph Vogel<sup>a,b,\*</sup>

<sup>a</sup>Center for Health and the Environment, <sup>b</sup>Department of Environmental Toxicology, University of California Davis, One Shields Avenue, Davis, CA 95616, USA

Table S1. Primer for quantitative real time PCR analyses

| Gene           | Sequence                                                                    |
|----------------|-----------------------------------------------------------------------------|
| $\beta$ -actin | FP: 5'-AGCCATGTACGTAGCCATCC-3'<br>RP: 5'-CTCTCAGCTGTGGTGGTGAA-3'            |
| CYP1A1         | FP: 5'-GGCCACTTTGACCCTTACAA-3'<br>RP: 5'-CAGGTAACGGAGGACAGGAA-3'            |
| COX-2          | FP: 5'-TTTGTGAGTCATTCACCAGACAGAT-3'<br>RP: 5'-CAGTATTGAGGAGAACAGATGGGATT-3' |
| CEBP- $\beta$  | FP: 5'-CAAGCTGAGCGACGAGTACA-3'<br>RP: 5'-AGCTGCTCCACCTTCTTCTG-3'            |
| RelB           | FP: 5'-TGATCCACATGGAATCGAGA-3'<br>RP: 5'-CAGGAAGGGATATGGAAGCA-3'            |
| IL-1 $\beta$   | FP: 5'-GGGCCTCAAAGGAAAGAATC-3'<br>RP: 5'-TACCAGTTGGGGAACCTCTGC-3'           |
| IL-6           | FP: 5'-AGTTGCCTTCTTGGGACTGA-3'<br>RP: 5'-TCCACGATTTCCCAGAGAAC-3'            |
| KC             | FP: 5'-CTTGAAGGTGTTGCCCTCAG-3'<br>RP: 5'-TGGGGACACCTTTTAGCATC-3'            |
| IL-10          | FP: 5'-CCAAGCCTTATCGGAAATGA-3'<br>RP: 5'-TTTTCACAGGGGAGAAATCG-3'            |
| TNF- $\alpha$  | FP: 5'-TGCAATGAAGTGCAGGAGTC-3'<br>RP: 5'-TGGGCTCTGCTGTAGTCCTT-3'            |
| PAI-2          | FP: 5'-ACCTGCTACCCGAAGGTTCT-3'<br>RP: 5'-CGAGTTCACACGGAAAGGAT-3'            |
| IDO-1          | FP: 5'-GGCTAGAAATCTGCCTGTGC-3'<br>RP: 5'-AGAGCTCGCAGTAGGGAACA-3'            |
| IDO-2          | FP: 5'-GCTATCACCATGGGATTCGT-3'<br>RP: 5'-AGAGATCTTGGCAGCACCTT-3'            |

**Fig. S1.** Expression of selected AhR and LPS target genes in female C57BL/6 wild type (WT) mice. Total RNA was prepared from lung (open bars) and liver (shaded bars) of WT mice. Level of mRNA expression was analyzed via real-time PCR. The mRNA expression levels were normalized to  $\beta$ -actin. The primers for CYP1A1, COX-2, CEBP $\beta$ , RelB, IL-1 $\beta$ , IL-6, KC, IL-10, TNF- $\alpha$ , PAI-2, IDO-1 and IDO-2 are listed in Table 1. Values are shown as mean $\pm$ SD from five different animals.

### Expression levels of selected genes in WT mice

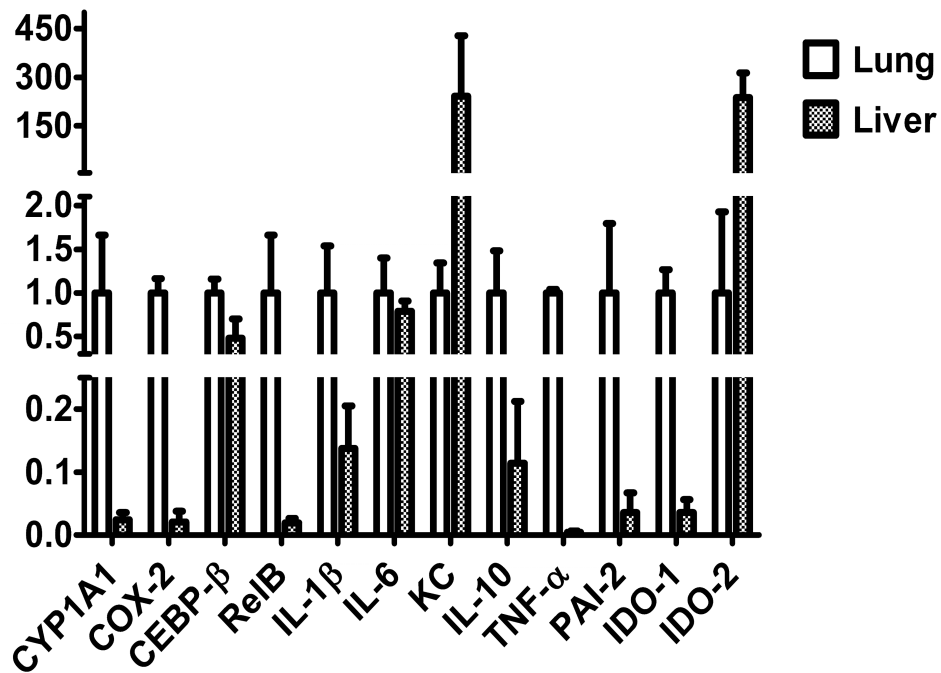

Supplement: NIHMS306108-supplement-supplemental_data.pdf [file NIHMS306108-supplement-supplemental_data.pdf]
